# Supplementary material for: Sea Level Rise in Europe: Knowledge gaps identified through a participatory approach
Source: Copernicus journal article supplement (doi:10.5194/sp-2023-34), 2023-12-07
Supplement: Supplementary file 1 [file sp-2023-34-supplement.pdf]

Supplementary material for

## **Chapter 1: Sea Level Rise in Europe: knowledge gaps identified through a participatory approach**

1. Tables S1-S3. Statistics of responses to closed-ended survey questions using a Likert scale
2. KH-SLR survey “Profiling SLR needs & knowledge gaps”
3. Agenda for the KH-SLR scoping workshop for the North Sea -Arctic Seas basins
4. Agenda for the KH-SLR scoping workshop for the Eastern Atlantic basin
5. Agenda for the KH-SLR scoping workshop for the Mediterranean Sea-Black Sea basins
6. Agenda for the KH-SLR scoping workshop for the Baltic Sea basin
7. Methodology to derive data on coastal archetypes in Table 1 of the manuscript
8. Methodology to derive data on population in the LECZ in Table 1 of the manuscript

**Table S1. Statistics of responses to closed-ended survey questions using a Likert scale for “SLR-information”**

| Statement | Group | Mean | SD  | Median | Mode | N   | Scale |
|-----------|-------|------|-----|--------|------|-----|-------|
| 1         | Gov   | 2.7  | 1.1 | 3.0    | 2.0  | 73  | (a)   |
|           | Res   | 2.8  | 1.0 | 3.0    | 2.0  | 127 |       |
| 2         | Gov   | 4.4  | 0.8 | 5.0    | 5.0  | 73  | (a)   |
|           | Res   | 4.3  | 0.9 | 4.0    | 5.0  | 131 |       |
| 3         | Gov   | 4.4  | 0.8 | 5.0    | 5.0  | 73  | (a)   |
|           | Res   | 4.2  | 0.8 | 4.0    | 4.0  | 131 |       |

SD: standard deviation

(a) 1: strongly disagree, 2: disagree, 3: neutral, 4: agree, 5: strongly agree

*Statement 1:* “For my work crucial information and data on SLR is missing and/or not accessible”

*Statement 2:* “Regular updates on SLR projections are needed for the successful implementation of a coastal management planning/strategy”.

*Statement 3:* “It is necessary to know in depth the uncertainty in SLR projections for coastal management.”

**Table S2. Statistics of responses to closed-ended survey questions using a Likert scale for “SLR-induced hazards and impacts”**

| Statement | Group | Mean | SD  | Median | Mode | N   | Scale |
|-----------|-------|------|-----|--------|------|-----|-------|
| 1         | Gov   | 4.6  | 0.7 | 5.0    | 5.0  | 72  | (a)   |
|           | Res   | 4.6  | 0.6 | 5.0    | 5.0  | 132 |       |
| 2         | Gov   | 3.2  | 1.0 | 3.0    | 2.0  | 73  | (b)   |
|           | Res   | 2.9  | 1.1 | 3.0    | 2.0  | 131 |       |

SD: standard deviation

(a) 1: not important, 2: secondary, 3: neutral, 4: important, 5: very important

(b) 1: strongly disagree, 2: disagree, 3: neutral, 4: agree, 5: strongly agree

*Statement 1:* “How important do you think it is to use SLR-impact assessments in making decisions on planning?”

*Statement 2:* “High quality and up-to-date assessments of SLR-induced impacts are available for making decisions on planning.”

**Table S3. Statistics of responses to closed-ended survey questions using a Likert scale for “policy decisions/adaptation strategies”.**

| Statement | Group | Mean | SD  | Median | Mode | N   | Scale |
|-----------|-------|------|-----|--------|------|-----|-------|
| 1         | Gov   | 2.9  | 0.9 | 3.0    | 2.0  | 72  | (a)   |
|           | Res   | 2.5  | 0.9 | 2.0    | 2.0  | 129 |       |
| 2         | Gov   | 3.4  | 1.0 | 3.0    | 3.0  | 70  | (b)   |
|           | Res   | 3.0  | 1.1 | 3.0    | 3.0  | 130 |       |
| 3         | Gov   | 4.0  | 0.9 | 4.0    | 4.0  | 70  | (c)   |
|           | Res   | 3.8  | 1.1 | 4.0    | 4.0  | 127 |       |
| 4         | Gov   | 4.4  | 0.7 | 5.0    | 5.0  | 72  | (b)   |
|           | Res   | 4.4  | 0.7 | 4.0    | 5.0  | 130 |       |

SD: standard deviation

(a) 1: inexistent, 2: insufficient, 3: neutral, 4: effective, 5: very effective

(b) 1: no plans, 2: strongly disagree, 3: disagree, 4: agree, 5: strongly agree

(c) 1: don't know what NBS are, 2: hardly applicable in my country/region, 3: secondary option alongside traditional measures, 4: appropriate in selected sites, 5: core for adaptation

(d) 1: strongly disagree, 2: disagree, 3: neutral, 4: agree, 5: strongly agree

*Statement 1:* “How effective do you consider the present adaptation strategy to SLR in your country/region?”

*Statement 2:* “Existing adaptation strategies/plans are flexible enough to adapt to future updates in SLR-induced impacts, or to cope with the inherent uncertainty in their assessment.”

*Statement 3:* “Nature-based solutions (NBS) are appropriate as adaptation measures to SLR in your country/region.”

*Statement 4:* “The IPCC Assessment Reports are useful for my work.”

## KH-SLR survey “Profiling SLR needs & knowledge gaps”

### General information

Name

Surname

Email address

What best describes the institute/organization you work for?

[Check all that apply]

- Central Government
- Regional Government
- International organization
- University / research institute
- Private company
- Non-governmental organization
- Other (*please, specify below*)

What is the name of your organisation?

In which country do you reside (and for which you are reporting here)?

Which Sea basin(s) better reflect(s) your area of work?

[Check all that apply]

- Artic Ocean
- Baltic Sea
- Black Sea
- Mediterranean Sea
- Eastern Atlantic
- North Sea
- Other (*please, specify below*)

What is the focus of most of your work?

### On Sea Level Rise (SLR) information

*Please rate the following statement:*

For my work crucial information and data on SLR is **missing** and/or **not accessible**.

- Strongly disagree
- Disagree
- Neutral (*please, comment below if needed*)
- Agree
- Strongly agree

What type of SLR data and/or information do you **have access** to?

[Check all that apply]

- None
- Projections from tidal records
- Global (e.g. IPCC) mean sea level projections
- Regional mean sea level projections
- Other (*please, specify below*)

What type of SLR data and/or information do you **use**?

[Check all that apply]

- None
- Projections from tidal records
- Fixed mean sea level (e.g. 1 m)
- Global (e.g. IPCC) mean sea level projections
- Regional mean sea level projections
- Other (*please, specify below*)

*Please rate the following statement:*

**Regular updates** on SLR projections are needed for the successful implementation of a coastal management planning/strategy.

- Strongly disagree
- Disagree
- Neutral - depends on the scale of the project (*please, comment below if needed*)
- Agree
- Strongly agree

*Please rate the following statement:*

It is necessary to know in depth the **uncertainty** in SLR projections for coastal management.

- Strongly disagree
- Disagree
- Neutral - depends on the scale of the project (*please, comment below if needed*)
- Agree
- Strongly agree

From the perspective of your work, what are the largest **knowledge gaps** in SLR?

### **On SLR-induced hazards & impacts**

Which SLR-induced **impacts** are relevant for your country/region?

[Check all that apply]

- None
- Permanently flooded areas
- Beach/coastal erosion
- Salinization/salt water intrusion
- Ecosystem changes - habitat loss
- Increasing storm impacts
- Private property damage or loss
- Public infrastructure damage or loss
- Others (*please, specify below if needed*)

How important do you think it is to use SLR-impact **assessments** in making decisions on planning?

- Not important
- Secondary
- Neutral - depends on the scale (*please, specify below if needed*)
- Important
- Very important

*Please rate the following statement:*

High quality and up-to-date assessments of SLR-induced impacts are **available** for making decisions on planning.

- Strongly disagree
- Disagree
- Neutral (*please, comment below if needed*)
- Agree
- Strongly agree

### **On policy decisions / adaptation strategies**

What are the key policy decisions for which you **currently use SLR** (and coastal risk) information?

Are there other decisions/purposes for which you currently **don't consider SLR**, but for which you think it would be important to do so?

How **effective** do you consider the present adaptation strategy to SLR in your country/region?

- Inexistent
- Insufficient
- Neutral (*please, comment below if needed*)
- Effective
- Very effective

*Please rate the following statement:*

Existing adaptation strategies/plans are **flexible** enough to adapt to future updates in SLR-induced impacts, or to cope with the inherent uncertainty in their assessment.

- There are no plans
- Strongly disagree (this possibility is not considered)
- Disagree
- Agree
- Strongly agree (they include the need to be reviewed/evaluated from time to time).
- Other / Unsure (*please, comment below if needed*)

*Please rate the following statement:*

Nature-based solutions (NBS) are **appropriate** as adaptation measures to SLR in your country/region.

- I don't know what NBS are (*please, comment below if needed*)
- They are hardly applicable in my country/region (*please, comment below if needed*)
- They would be a secondary option alongside traditional adaptation measures (*please, comment below if needed*)
- They are appropriate but in selected sites (*please, comment below if needed*)
- They must be the core for adaptation (*please, comment below if needed*)

*Please rate the following statement:*

The IPCC Assessment Reports are **useful** for my work.

- Strongly disagree
- Disagree
- Neutral (*please, comment below if needed*)
- Agree
- Strongly agree

## **KH-SLR scoping workshop: North Sea & Arctic Seas basins**

Day 1: 21st March 2022

- **Welcome & Intro.** *Background on the Knowledge Hub on Sea Level Rise*
- **KH SLR survey results** for the *North Sea and Arctic Seas basins*
- **Panel discussion:** *SLR adaptation and policies around the North Sea and Arctic Seas basins*
  - Daphné Thoon (BE)
  - Caroline Sutton (UK)
  - Andreas Wurpts (DE)
  - Saskia van Gool (NL)
  - Cathrine Andersen (NO)
- **Plenary session:** *SLR adaptation, policies and science – what can a basin -specific assessment report for you?*
- **Interactive Breakout Sessions.** Informing content of the Assessment Report for the Mediterranean and Black seas basins (three parallel rotating sessions: SLR information + SLR impacts + SLR adaptation)
- **Feedback from the breakout sessions**
- **Wrap-up of the day & outlook day 2**

Day 2: 22nd March 2022

- **Welcome & Recap of Day 1**
- **Keynote Speech:** *Sea Level Rise – physical science.* Helene Hewitt
- **Questions & Answers**
- **Keynote Speech:** *SLR impacts and adaptation.* Marjolijn Haasnoot
- **Questions & Answers**
- **Interactive Breakout Sessions.** Informing content of the Assessment Report for the North Sea and Arctic Seas basins (three parallel rotating sessions: SLR information + SLR impacts + SLR adaptation)
- **Feedback from the breakout sessions**
- **Wrap-up of the workshop.**

## **KH-SLR scoping workshop: Eastern Atlantic basin**

Day 1: 28th April 2022

- **Welcome & Intro.** *Background on the Knowledge Hub on Sea Level Rise*
- **KH SLR survey results** for the *Eastern Atlantic basin*
- **Keynote Speech:** *Sea Level Rise in the East Atlantic – latest projections, vulnerability and adaptation.* Matt Palmer (*sea level projections*), Gonéri Le Cozannet (*vulnerability and adaptation*)
- **Questions & Answers**
- **Panel discussion:** *SLR science and impacts in the Eastern Atlantic*
  - William Llovel (FR)
  - Gaël Durand (FR)
  - João Dias (PT)
  - Dewi le Bars (NL)
  - Robert Slomp (NL)
  - Amelie Roche (FR)
- **Plenary session:** *what would you like to see included in the regional assessment report?*
- **Wrap-up of the day & outlook day 2**

Day 2: 29th April 2022

- **Welcome & Recap of Day 1**
- **Keynote Speech:** *Adapting cities to SLR in Europe – the Sea'ties Initiative.* Lisa Devignol
- **Panel discussion:** *SLR adaptation and policies around the East Atlantic*
  - Ivan Haigh (UK)
  - Jean Prou (FR)
  - Anne-Sophie Leclere (FR)
  - Garry O'Connell (IE)
  - Robert Slomp (NL)
- **Q &A on Panel presentations**
- **Interactive Breakout Sessions.** Informing content of the Assessment Report for the East Atlantic basin
- **Feedback from the breakout sessions**
- **Wrap-up of the workshop.**



## **KH-SLR scoping workshop: Mediterranean & Black Sea basins**

Day 1: 5th May 2022

- **Welcome & Intro.** *Background on the Knowledge Hub on Sea Level Rise*
- **KH SLR survey results** for the *Mediterranean Sea and Black Sea basins*
- **Keynote Speech:** *Sea Level Rise in the Mediterranean and Black Seas.* Begoña Perez (*sea level observations*), Marta Marcos (*SLR projections*)
- **Questions & Answers**
- **Keynote Speech:** *SLR impacts, vulnerability and adaptation.* Gonéri Le Cozannet (*SLR impacts*) & R.Montanari/Valentini (*adaptation plans*)
- **Questions & Answers**
- **Interactive Breakout Sessions.** Informing content of the Assessment Report for the Mediterranean and Black seas basins (three parallel rotating sessions: SLR information + SLR impacts + SLR adaptation)
- **Feedback from the breakout sessions**
- **Wrap-up of the day & outlook day 2**

Day 2: 6th May 2022

- **Welcome & Recap of Day 1**
- **Panel discussion:** *SLR needs and contribution to adaptation policies from different administration/stakeholders' typologies*
  - UNEP\_MAP/PAP-RAC (supranational level-int organization, Med Sea)
  - Black Sea Convention (supranational level-int organization, Black Sea)
  - Barcelona municipality (municipal level, ES)
  - Conference of Maritime Regions (regional level, FR)
  - Croatia central government representative (central government level, HR)
- **Q & A on Panel presentations**
- **Interactive Breakout Sessions.** Informing content of the Assessment Report for the Mediterranean and Black seas basins (three parallel rotating sessions: SLR information + SLR impacts + SLR adaptation)
- **Feedback from the breakout sessions**
- **Wrap-up of the workshop.**

## **KH-SLR scoping workshop: Baltic Sea basin**

Day 1: 9th May 2022

- **Welcome & Intro.** *Background on the Knowledge Hub on Sea Level Rise*
- **Summary of existing knowledge based upon the Baltic Earth Assessment reports and KH SLR survey results** for the *Baltic Sea basin*
- **Keynote Speech:** *EuroCORDEX results on atmospheric changes.* Ole Bøssing Christensen
- **Keynote Speech:** *Results of the latest future sea level projections and sea level extremes.* Hagen Radtke
- **Keynote Speech:** *Modelled and projected sea level extremes at the coasts of the eastern Baltic Sea.* Tarmo Soomere
- **Keynote Speech:** *Sea level rise, extreme sea levels and how to combine them: views from a country with large spatial gradients in sea level change.* Magnus Hieronymus
- **Keynote Speech:** *Coastal risk management along the Baltic Sea coast of Schleswig-Holstein, Germany, under accelerated sea level rise.* Jacobus Hofstede
- **Interactive Breakout Sessions.** Informing content of the Assessment Report for the Mediterranean and Black seas basins (three parallel rotating sessions: SLR information + SLR impacts + SLR adaptation)
- **Feedback from the breakout sessions**

Day 2: 10th May 2022

- **Welcome & Recap of Day 1**
- **Keynote Speech:** *Operating Kiel Canal under climate change.* Jürgen Holfort
- **Keynote Speech:** *The impact of sea level rise on the coast of Mecklenburg Western Pommerania, Germany.* Arne Arns
- **Keynote Speech:** *The Danish Climate Atlas's perspective on sea level rise adaptation.* Jian Su
- **Keynote Speech:** *Imperatives for the management of sea level rise on the Baltic Sea coast.* Kevin Parnell
- **Keynote Speech:** *Lithuanian coastal risk management: sea level rise impact on compound coastal-river flood risk.* Inga Dailidienė
- **Interactive Breakout Sessions.** Informing content of the Assessment Report for the
- **Discussion and summary of the workshop, next steps and outlook final conference**

## Methodology to derive data on coastal archetypes in Table 1 of the manuscript

To derive coastal archetypes, we used the following datasets:

| Provider     | Description                                          | Source                                                                                                                                                                                              |
|--------------|------------------------------------------------------|-----------------------------------------------------------------------------------------------------------------------------------------------------------------------------------------------------|
| ICES         | ICES_ecoregions                                      | <a href="https://www.ices.dk/Pages/default.aspx">https://www.ices.dk/Pages/default.aspx</a>                                                                                                         |
| EEA          | Coastal zones Land use classification (10 km inland) | <a href="https://www.eea.europa.eu/en/datahub/datahubitem-view/46fccbdc-d848-47a7-a58d-2aabc21c07cf">https://www.eea.europa.eu/en/datahub/datahubitem-view/46fccbdc-d848-47a7-a58d-2aabc21c07cf</a> |
| UNEP         | Global Estuary Database                              | <a href="https://data.unep-wcmc.org/datasets/23">https://data.unep-wcmc.org/datasets/23</a>                                                                                                         |
| Global Delta | Global Delta database                                | <a href="https://www.globaldeltarisk.net/data.html">https://www.globaldeltarisk.net/data.html</a>                                                                                                   |

**Figure S1. ICES ecoregions.**

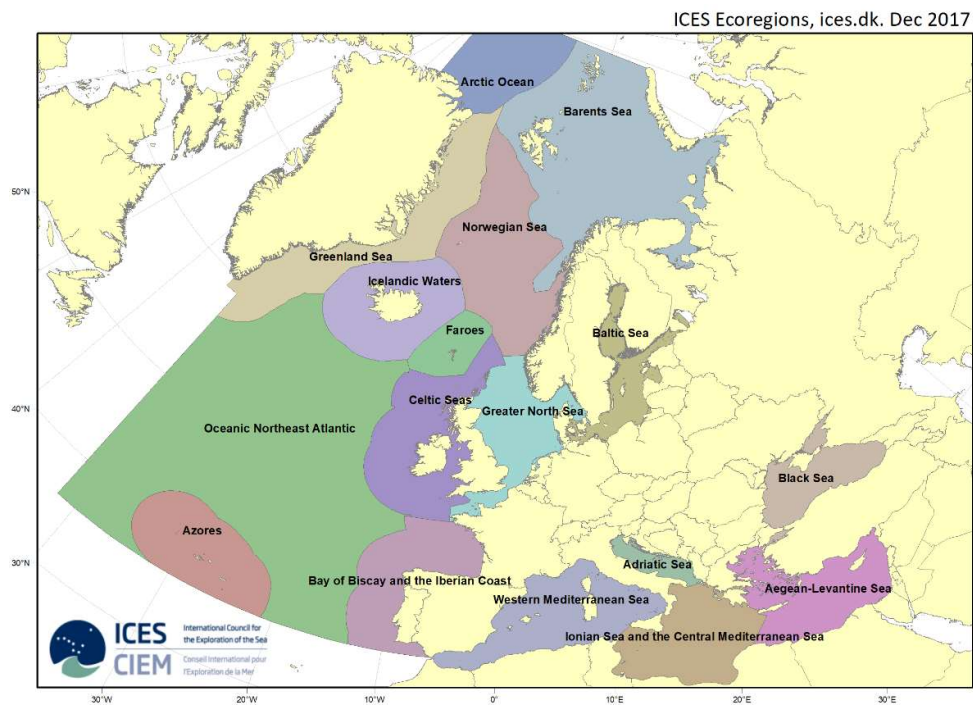

We attribute the following ICES ecoregions to the basins as we use them in the Knowledge Hub on Sea Level Rise:

| KH Sea Level Rise Basin | ICES Ecoregion                      |
|-------------------------|-------------------------------------|
| Atlantic                | Arctic Ocean                        |
| Atlantic                | Azores                              |
| Atlantic                | Barents Sea                         |
| Atlantic                | Bay of Biscay and the Iberian Coast |
| Atlantic                | Celtic Seas                         |
| Atlantic                | Faroes                              |
| Atlantic                | Greenland Sea                       |
| Atlantic                | Icelandic Waters                    |
| Atlantic                | Norwegian Sea                       |

|                   |                                              |
|-------------------|----------------------------------------------|
| Atlantic          | Oceanic Northeast Atlantic                   |
| Baltic Sea        | Baltic Sea                                   |
| Black Sea         | Black Sea                                    |
| Greater North Sea | Greater North Sea                            |
| Mediterranean     | Adriatic Sea                                 |
| Mediterranean     | Aegean-Levantine Sea                         |
| Mediterranean     | Ionian Sea and the Central Mediterranean Sea |
| Mediterranean     | Western Mediterranean Sea                    |

Based on the Coastal zones Land use classification, the Global Estuary Database and the Global Delta database, we developed the following classification for coastal zones. We omit coastal zone polygons, that we cannot describe with these datasets.

| Coastal Archetype (CA) ID | Description | Delta or Estuary | Delta and Estuary |
|---------------------------|-------------|------------------|-------------------|
| 1                         | Urban       |                  |                   |
| 2                         | Rural       |                  |                   |
| 3                         | Urban       | Delta            |                   |
| 4                         | Rural       | Delta            |                   |
| 5                         | Urban       | Estuary          |                   |
| 6                         | Rural       | Estuary          |                   |
| 7                         | Urban       | Delta            | Estuary           |
| 8                         | Rural       | Delta            | Estuary           |
| 20 (7)                    | Cliff       |                  |                   |
| 22                        | Cliff       | Delta            |                   |
| 24                        | Cliff       | Estuary          |                   |
| 26                        | Cliff       | Delta            | Estuary           |
| 30 (9)                    | Nature      |                  |                   |
| 32                        | Nature      | Delta            |                   |
| 34                        | Nature      | Estuary          |                   |
| 36                        | Nature      | Delta            | Estuary           |

The coastal zone land use data is part of the Copernicus Land Monitoring Service (CLMS) Local Component. It covers a buffer zone of the coastline 10km inland and divides the European coastline into land use polygons. The class definitions follow the pre-defined nomenclature on the basis of Mapping and Assessment of Ecosystems and their Services (MAES) typology of ecosystems (Level 1 to Level 4) and CORINE Land Cover adapted to the specific characteristics of coastal zones. The classification provides 71 distinct thematic classes with a Minimum Mapping Unit (MMU) of 0.5 ha and a Minimum Mapping Width (MMW) of 10 m. For further information on the CLMS Local Component please refer to <https://land.copernicus.eu/local>.

**Step 1:** We reclassified the 71 coastal zones land uses classes to match our classification of coastal archetypes:

| Final class ID | Land use ID | Description                         |
|----------------|-------------|-------------------------------------|
| 1              | 11110       | Continuous urban fabric (IMD =>80%) |

|          |       |                                                                                       |
|----------|-------|---------------------------------------------------------------------------------------|
| <i>1</i> | 11120 | Dense urban fabric (IMD =>30-80%)                                                     |
| <i>1</i> | 11130 | Low density fabric (IMD <30%)                                                         |
| <i>1</i> | 11210 | Industrial, commercial, public and military units (other)                             |
| <i>1</i> | 11220 | Nuclear energy plants and associated land                                             |
| <i>1</i> | 12100 | Road networks and associated land                                                     |
| <i>1</i> | 12200 | Railways and associated land                                                          |
| <i>1</i> | 12310 | Cargo port                                                                            |
| <i>1</i> | 12320 | Passenger port                                                                        |
| <i>1</i> | 12330 | Fishing port                                                                          |
| <i>1</i> | 12340 | Naval port                                                                            |
| <i>1</i> | 12350 | Marinas                                                                               |
| <i>1</i> | 12360 | Local multi-functional harbours                                                       |
| <i>1</i> | 12370 | Shipyards                                                                             |
| <i>1</i> | 12400 | Airports and associated land                                                          |
| <i>2</i> | 13110 | Mineral extraction sites                                                              |
| <i>2</i> | 13120 | Dump sites                                                                            |
| <i>2</i> | 13130 | Construction sites                                                                    |
| <i>2</i> | 13200 | Land without current use                                                              |
| <i>2</i> | 14000 | Green urban, sports and leisure facilities                                            |
| <i>2</i> | 21100 | Arable irrigated and non-irrigated land                                               |
| <i>2</i> | 21200 | Greenhouses                                                                           |
| <i>2</i> | 22100 | Vineyards, fruit trees and berry plantations                                          |
| <i>2</i> | 22200 | Olive groves                                                                          |
| <i>2</i> | 23100 | Annual crops associated with permanent crops                                          |
| <i>2</i> | 23200 | Complex cultivation patterns                                                          |
| <i>2</i> | 23300 | Land principally occupied by agriculture with significant areas of natural vegetation |
| <i>2</i> | 23400 | Agro-forestry                                                                         |
| <i>9</i> | 31100 | Natural & semi-natural broadleaved forest                                             |
| <i>9</i> | 31200 | Highly artificial broadleaved plantations                                             |
| <i>9</i> | 32100 | Natural & semi-natural coniferous forest                                              |
| <i>9</i> | 32200 | Highly artificial coniferous plantations                                              |
| <i>9</i> | 33100 | Natural & semi-natural mixed forest                                                   |
| <i>9</i> | 33200 | Highly artificial mixed plantations                                                   |
| <i>9</i> | 34000 | Transitional woodland and scrub                                                       |
| <i>9</i> | 35000 | Lines of trees and scrub                                                              |
| <i>9</i> | 36000 | Damaged forest                                                                        |
| <i>2</i> | 41000 | Managed grassland                                                                     |
| <i>2</i> | 42100 | Semi-natural grassland                                                                |
| <i>9</i> | 42200 | Alpine and sub-alpine natural grassland                                               |
| <i>9</i> | 51000 | Heathland and moorland                                                                |
| <i>9</i> | 52000 | Alpine scrub land                                                                     |
| <i>9</i> | 53000 | Sclerophyllous scrubs                                                                 |
| <i>9</i> | 61100 | Sparse vegetation on sands                                                            |
| <i>9</i> | 61200 | Sparse vegetation on rocks                                                            |

|       |       |                                                      |
|-------|-------|------------------------------------------------------|
| 9     | 62111 | Sandy beaches                                        |
| 9     | 62112 | Shingle beaches                                      |
| 9     | 62120 | Dunes                                                |
| 9     | 62200 | River banks                                          |
| 7     | 63110 | Bare rocks and outcrops                              |
| 7     | 63120 | Coastal cliffs                                       |
| 9     | 63200 | Burnt areas (except burnt forest)                    |
| 9     | 63300 | Glaciers and perpetual snow                          |
| 9     | 71100 | Inland marshes                                       |
| 9     | 71210 | Exploited peat bogs                                  |
| 9     | 71220 | Unexploited peat bogs                                |
| 9     | 72100 | Salt marshes                                         |
| 9     | 72200 | Salines                                              |
| 9     | 72300 | Intertidal flats                                     |
| 9     | 81100 | Natural & semi-natural water courses                 |
| 9     | 81200 | Highly modified water courses and canals             |
| 9     | 81300 | Seasonally connected water courses (oxbows)          |
| 9     | 82100 | Natural lakes                                        |
| 9     | 82200 | Reservoirs                                           |
| 9     | 82300 | Aquaculture ponds                                    |
| 9     | 82400 | Standing water bodies of extractive industrial sites |
| 9     | 83100 | Lagoons                                              |
| 9     | 83200 | Estuaries                                            |
| 9999* | 83300 | Marine inlets and fjords                             |
| 9999* | 84100 | Open sea                                             |
| 9999* | 84200 | Coastal waters                                       |

\*9999 values have been omitted in the analysis.

**Step 2:** We attribute the coastal zone land use coastline segments to the ICES basins. Further, all coastal zone segments that intersect with a delta polygon (from Global Delta data) and/or an estuary polygon (based on UNEP data) are classified delta and/or estuary.

**Step 3:** We calculate the percentage of polygons that are assigned to each coastal archetype of the sum of coastal zone land use polygons in each basin. Note that the Atlantic basin mainly consists of the Atlantic coasts of Spain, Portugal, France, Ireland, United Kingdom, Greenland, Iceland and Norway and is not completely covered by land use data. Note that the European dataset on coastal land use does not contain data on the Russian, Georgian and Turkish coastlines of the Black Sea and neither on the non-European parts of the Mediterranean coast.

The product of this analysis is the following classification:

| Basin ID | Basin    | Final class ID | Description   | Area (km <sup>2</sup> ) | Percentage |
|----------|----------|----------------|---------------|-------------------------|------------|
| 1        | Atlantic | 1              | Urban         | 10844.403               | 4.290      |
| 1        | Atlantic | 2              | Rural         | 55402.549               | 21.917     |
| 1        | Atlantic | 5              | Urban,Estuary | 1121.471                | 0.444      |
| 1        | Atlantic | 6              | Rural,Estuary | 1749.912                | 0.692      |
| 1        | Atlantic | 20             | Cliff         | 12535.390               | 4.959      |
| 1        | Atlantic | 24             | Cliff,Estuary | 33.072                  | 0.013      |

|   |                   |    |                      |            |        |
|---|-------------------|----|----------------------|------------|--------|
| 1 | Atlantic          | 30 | Nature               | 157931.123 | 62.476 |
| 1 | Atlantic          | 34 | Nature,Estuary       | 13166.986  | 5.209  |
|   |                   |    |                      |            |        |
| 2 | Baltic Sea        | 1  | Urban                | 6988.267   | 6.260  |
| 2 | Baltic Sea        | 2  | Rural                | 28394.390  | 25.436 |
| 2 | Baltic Sea        | 3  | Urban,Delta          | 124.946    | 0.112  |
| 2 | Baltic Sea        | 4  | Rural,Delta          | 543.750    | 0.487  |
| 2 | Baltic Sea        | 5  | Urban,Estuary        | 1151.892   | 1.032  |
| 2 | Baltic Sea        | 6  | Rural,Estuary        | 1974.607   | 1.769  |
| 2 | Baltic Sea        | 7  | Urban,Delta,Estuary  | 13.236     | 0.012  |
| 2 | Baltic Sea        | 8  | Rural,Delta,Estuary  | 4.467      | 0.004  |
| 2 | Baltic Sea        | 20 | Cliff                | 198.636    | 0.178  |
| 2 | Baltic Sea        | 22 | Cliff,Delta          | 0.009      | 0.000  |
| 2 | Baltic Sea        | 24 | Cliff,Estuary        | 6.258      | 0.006  |
| 2 | Baltic Sea        | 30 | Nature               | 57661.587  | 51.653 |
| 2 | Baltic Sea        | 32 | Nature,Delta         | 190.245    | 0.170  |
| 2 | Baltic Sea        | 34 | Nature,Estuary       | 13871.783  | 12.426 |
| 2 | Baltic Sea        | 36 | Nature,Delta,Estuary | 507.688    | 0.455  |
|   |                   |    |                      |            |        |
| 3 | Black Sea         | 1  | Urban                | 2389.236   | 7.448  |
| 3 | Black Sea         | 2  | Rural                | 12182.700  | 37.977 |
| 3 | Black Sea         | 3  | Urban,Delta          | 8.624      | 0.027  |
| 3 | Black Sea         | 4  | Rural,Delta          | 104.672    | 0.326  |
| 3 | Black Sea         | 5  | Urban,Estuary        | 288.184    | 0.898  |
| 3 | Black Sea         | 6  | Rural,Estuary        | 175.896    | 0.548  |
| 3 | Black Sea         | 7  | Urban,Delta,Estuary  | 5.109      | 0.016  |
| 3 | Black Sea         | 8  | Rural,Delta,Estuary  | 177.195    | 0.552  |
| 3 | Black Sea         | 20 | Cliff                | 16.616     | 0.052  |
| 3 | Black Sea         | 24 | Cliff,Estuary        | 0.160      | 0.000  |
| 3 | Black Sea         | 30 | Nature               | 13022.411  | 40.594 |
| 3 | Black Sea         | 32 | Nature,Delta         | 570.618    | 1.779  |
| 3 | Black Sea         | 34 | Nature,Estuary       | 320.431    | 0.999  |
| 3 | Black Sea         | 36 | Nature,Delta,Estuary | 2817.405   | 8.783  |
|   |                   |    |                      |            |        |
| 4 | Greater North Sea | 1  | Urban                | 10685.184  | 6.436  |
| 4 | Greater North Sea | 2  | Rural                | 47396.495  | 28.546 |
| 4 | Greater North Sea | 3  | Urban,Delta          | 805.156    | 0.485  |
| 4 | Greater North Sea | 4  | Rural,Delta          | 2733.931   | 1.647  |
| 4 | Greater North Sea | 5  | Urban,Estuary        | 1197.972   | 0.722  |
| 4 | Greater North Sea | 6  | Rural,Estuary        | 3604.033   | 2.171  |
| 4 | Greater North Sea | 7  | Urban,Delta,Estuary  | 684.394    | 0.412  |
| 4 | Greater North Sea | 8  | Rural,Delta,Estuary  | 239.334    | 0.144  |
| 4 | Greater North Sea | 20 | Cliff                | 1435.843   | 0.865  |
| 4 | Greater North Sea | 24 | Cliff,Estuary        | 3.847      | 0.002  |
| 4 | Greater North Sea | 30 | Nature               | 56575.008  | 34.074 |
| 4 | Greater North Sea | 32 | Nature,Delta         | 1796.976   | 1.082  |
| 4 | Greater North Sea | 34 | Nature,Estuary       | 36089.380  | 21.736 |

|   |                   |    |                      |           |        |
|---|-------------------|----|----------------------|-----------|--------|
| 4 | Greater North Sea | 36 | Nature,Delta,Estuary | 2787.463  | 1.679  |
| 5 | Mediterranean     | 1  | Urban                | 13844.798 | 6.553  |
| 5 | Mediterranean     | 2  | Rural                | 70713.643 | 33.471 |
| 5 | Mediterranean     | 3  | Urban,Delta          | 139.100   | 0.066  |
| 5 | Mediterranean     | 4  | Rural,Delta          | 1486.370  | 0.704  |
| 5 | Mediterranean     | 5  | Urban,Estuary        | 801.773   | 0.380  |
| 5 | Mediterranean     | 6  | Rural,Estuary        | 1367.908  | 0.647  |
| 5 | Mediterranean     | 7  | Urban,Delta,Estuary  | 107.872   | 0.051  |
| 5 | Mediterranean     | 8  | Rural,Delta,Estuary  | 214.449   | 0.102  |
| 5 | Mediterranean     | 20 | Cliff                | 1136.007  | 0.538  |
| 5 | Mediterranean     | 22 | Cliff,Delta          | 0.088     | 0.000  |
| 5 | Mediterranean     | 24 | Cliff,Estuary        | 7.601     | 0.004  |
| 5 | Mediterranean     | 26 | Cliff,Delta,Estuary  | 0.047     | 0.000  |
| 5 | Mediterranean     | 30 | Nature               | 84555.174 | 40.023 |
| 5 | Mediterranean     | 32 | Nature,Delta         | 625.976   | 0.296  |
| 5 | Mediterranean     | 34 | Nature,Estuary       | 35211.373 | 16.667 |
| 5 | Mediterranean     | 36 | Nature,Delta,Estuary | 1054.005  | 0.499  |

**Figure S2. Delineation of coastal archetypes across European Sea basins.**

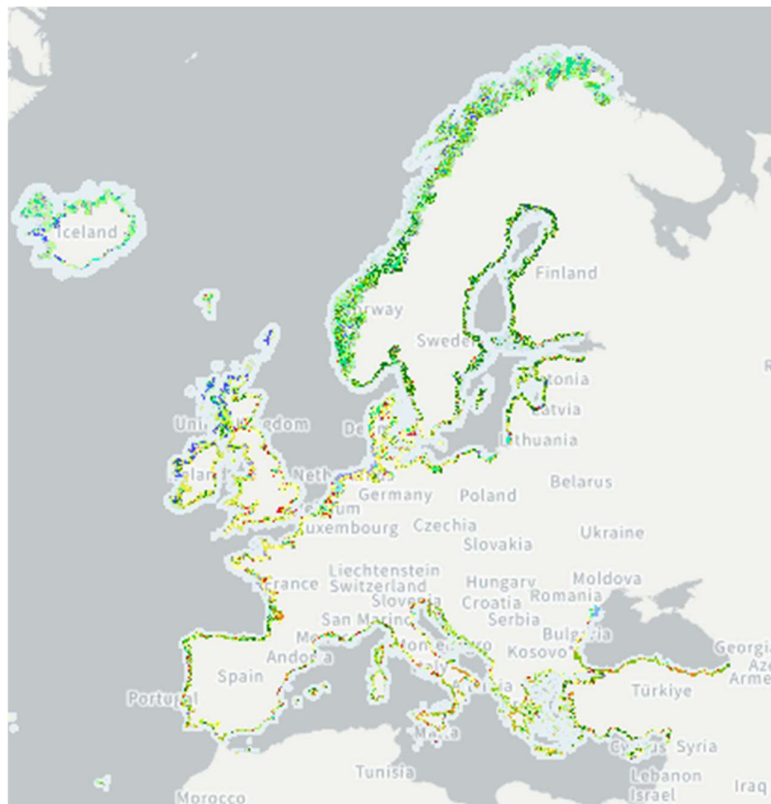



**Methodology to derive data on population in the LECZ in Table 1 of the manuscript**

To derive population in the Low Elevated Coastal Zone (LECZ), we used the following datasets:

| <b>Provider</b>   | <b>Description</b>                     | <b>Source</b>                                                                                                                                                                                         |
|-------------------|----------------------------------------|-------------------------------------------------------------------------------------------------------------------------------------------------------------------------------------------------------|
| <b>ICES</b>       | ICES_ecoregions                        | <a href="https://www.ices.dk/Pages/default.aspx">https://www.ices.dk/Pages/default.aspx</a>                                                                                                           |
| <b>World Pop</b>  | World population raster data           | <a href="https://hub.worldpop.org/project/categories?id=3">https://hub.worldpop.org/project/categories?id=3</a>                                                                                       |
| <b>Copernicus</b> | European Digital Elevation Model (DEM) | <a href="https://spacedata.copernicus.eu/en/web/guest/collections/copernicus-digital-elevation-model">https://spacedata.copernicus.eu/en/web/guest/collections/copernicus-digital-elevation-model</a> |

The Low Elevated Coastal Zone is defined in this context as the area of land within 10m above mean sea level. For land elevation we used the European DEM. The LECZ has been overlaid with world population data to identify population in the LECZ in those areas indicated in Figure S2. Finally, these data have been assigned to the European basins:

| <b>Basin</b>                     | <b>Total population within 10 m above MSL</b> |
|----------------------------------|-----------------------------------------------|
| Eastern Atlantic and Arctic Seas | 9.02 M                                        |
| Baltic Sea                       | 6.90 M                                        |
| Black Sea                        | 1.31 M                                        |
| Greater North Sea                | 24.88 M                                       |
| Mediterranean Sea                | 12.38 M                                       |
