# Supplementary material for: Sea Level Rise in Europe: Knowledge gaps identified through a participatory approach
Source: Copernicus journal article supplement (doi:10.5194/sp-2023-34), 2023-12-07
Supplement: Supplementary file [file sp-2023-34-AC1-supplement.pdf]

## Reviewer # 1

This work greatly complements existing sporadic knowledge of the state of Europe's adaptation to SLR. By combining both a basin-by-basin approach and a pan-European one, it provides an excellent assessment of trends in the application of existing knowledge, as well as gaps in actionable knowledge. This paper is also remarkably comprehensive and concise.

## Response to reviewer #1

Thank you very much for the time dedicated to review the manuscript and for comments and suggestions provided.

In what follows these comments and suggestions are addressed, where each comment is presented as given (in black) and then we specify how it will be addressed (in blue).

---

To further improve the rendering of these findings, it would be useful to report on the results obtained (if any) concerning the consideration given by stakeholders to the feasibility and effectiveness of the range of adaptation responses/solutions in the definition of strategies (not just the NBS typology, for which this analysis is already provided).

This point is significant as it could offer additional insights into stakeholders' perceptions regarding various adaptation options. However, it falls outside the intended scope of the survey, and thus, no specific mention was made of other options. The explicit reference to NBS was made to assess how the prevailing approach to adaptation measures, both within the EU and globally, is influencing stakeholders' perspectives.

Another point that deserves clarification: only the analysis of the Mediterranean region mentions social considerations. It would be interesting to elaborate on this point. Did respondents and participants from other regions not mention it? Are there underlying reasons for this Mediterranean specificity?

The mention of social aspects occurred in the basin-specific workshops. Consequently, the reference to the different topics reflects the interest and concerns of the diverse participants involved. Regarding the specific case highlighted by the reviewer, social aspects were indeed discussed in relation to both impacts (*the accurate estimation of the vulnerability of the densely populated coastal zones, and their exposure and values were considered as a top priority*) and adaptation (*Any adaptation policy should take into account social factors and community engagement, ensuring a participatory decision-making process where diverse stakeholders have a voice*). It is important to note that while these aspects were explicitly mentioned in the Mediterranean workshop, they remain relevant across all European basins (and worldwide). Their applicability and significance are widely accepted, though the explicit mention may vary among workshops.

To provide further context, we will include a comment acknowledging the applicability of these observations across all European basins.
